# Supplementary material
Source: PubMed Central journal article supplement (PMC2688979)
Supplement: 0811835106_0811835106SI.pdf [file 0811835106_0811835106SI.pdf]

# Supporting Information

Swanton et al. 10.1073/pnas.0811835106

## SI Methods

**Data Set.** Two MTS expression signatures were derived from publicly available data sets using 2 meta-analysis methods (<http://www.dspace.cam.ac.uk/handle/1810/217842>): MCF-7 and MDA-MB-231 breast cancer cell lines treated with docetaxel (1), ovarian cancer 1A9 xenografts treated with paclitaxel (2), the H460 non-small cell lung carcinoma cell line treated with paclitaxel (GSE 2182), and the A549 non-small cell lung carcinoma cell line treated with epothilone 906 or paclitaxel (3).

**Gene Annotation and Preprocessing.** The gene identifier IMAGE ID and GB\_ACC number, attached by the manufacturer to each probe on the chips, was translated to Entrez Gene ID using the publicly available software MatchMiner ([www.discover.nci.nih.gov/matchminer](http://www.discover.nci.nih.gov/matchminer)). In data sets in which multiple Entrez Gene IDs matched a single identifier, the first matching Entrez Gene ID was used based on the “chain of responsibility” in MatchMiner. This translation also was used across data sets. In cases where multiple Entrez Gene IDs matched a single identifier across data sets, the first one was selected and applied across data sets.

**Meta-Analysis Methods.** See <http://www.dspace.cam.ac.uk/handle/1810/217842>.

**Binomial Test and BTPC Method.** The BTPC method was used following the application of Entrez Gene IDs to each publicly available data set. The BTPC method delivers a number of genes that are differentially expressed across experiments in one direction and that exhibit a significant difference in expression level compared with control samples. In the first step, the ordinary binomial test was calculated for each gene using the dichotomized fold change values ( $-1$  for negative fold change and  $1$  for positive fold change) and a significance threshold of  $P \leq .05$ . Each gene was assessed for differential expression using the moderated  $t$ -test, implemented in the limma package in Bioconductor. The moderated  $t$  test uses a nonparametric empirical Bayes method to shrink the estimated sample variances toward a pooled estimate, resulting in more stable inference when the number of replicates is small. Based on the moderated  $t$ -test, the  $P$  values for each gene were calculated and adjusted for multiple testing by calculating a  $q$ -value (4). To account for the quality of the data sets, the  $q$ -values were weighted based on a measure of the spread (the interquartile range). To filter the genes in a second step, a threshold of the weighted mean  $q$ -values was used, delivering the signature.

Next, a permutation-based false discovery rate (FDR) was calculated to control the genes identified by chance alone. To perform the experiment label permutation simulation, the gene identifiers within one data set were separated from the values and randomly reassigned. In each permutation, a number of genes appeared, tagged to be significantly differentially expressed even though they were identified by chance alone. Ten permutations were performed, and the FDR was calculated for each permutation. The arithmetic mean across all FDRs delivers the overall FDR and thus the percentage of false-positive results within the significant genes. Three other meta-analysis methods were examined and validated by the FDR, but the BTPC method delivered the lowest FDR for both up-regulated and down-regulated genes. The SDs and 95% confidence intervals for the FDRs also were calculated for each meta-analysis method. The R-script for the BTPC method is enclosed within the file available at <http://www.dspace.cam.ac.uk/handle/1810/217842>.

**Rank Method.** The rank method delivers a number of genes that are regulated with a specific difference from control samples. The genes in each experiment were sorted by the fold change values, and a rank was calculated for each gene. Genes were selected based on a rank threshold of 20. Genes were selected for the signature if they appeared in half or more of the data sets and if in all of those data sets, the genes were consistently regulated in one direction with no assessment of significance level.

**CIN Signature.** The published CIN signatures (CIN70 and CIN27wp) and an extended gene list incorporating the top 5%, 10%, and 15% of genes overexpressed in the CIN signature were used in this analysis (5). Genes were excluded from the final signature (wp) if they were identified as cell cycle-regulated transcripts, resulting in a final gene list of CIN382wp, CIN826wp, and CIN1264wp (6).

**TaqMan Low-Density Arrays.** HCT116 *hSecurin*<sup>+/+</sup> and *hSecurin*<sup>-/-</sup>, A549, HCC-2998, SW620, COLO205, HCT-15, KM12, MCF7, MDA-MB-231, HS578T, and BT549 cells were plated at  $3 \times 10^6$  cells per 10-cm plate. After 24 h, the cells were treated for an additional 24 h with  $0.5 \times$  of the cell-specific GI50 of paclitaxel. Total RNA was extracted and cDNA was synthesized as described above. The TaqMan Low-Density Arrays (TLDA; Applied Biosystems) used allowed simultaneous quantification of 8 samples against 47 preloaded specifically designed TaqMan assays, with an additional 18S RNA and GAPDH TaqMan assay to detect the endogenous controls. For each port, 100  $\mu$ L of reaction mixture (containing 2  $\mu$ L of the 20- $\mu$ L room temperature reaction and  $2 \times$  TaqMan Universal PCR MasterMix) was added. The cards were run on the TLDA block of an Applied Biosystems 7900 HT real-time PCR system.

**Cell Culture and siRNA Transfection.** HCT-116 wild-type and isogenic *hSecurin*<sup>-/-</sup> isogenic cells (7) were cultured in DMEM supplemented with 10% FBS, 2 mM L-glutamine, 100  $\mu$ g/mL of streptomycin, and 100 U/mL of penicillin at 37 °C and 10% CO<sub>2</sub>. All other cell lines used in this study were from the NCI60 cell panel and were cultured in RPMI medium supplemented with 10% FBS, 2% bicarbonate, 2 mM L-glutamine, 100  $\mu$ g/mL of streptomycin, and 100 U/mL of penicillin at 37 °C and 5% CO<sub>2</sub>.

The siRNA (25 nM)–DharmaFect1 (both from Dharmacon) transfection mixture was pipetted, after which  $4.5 \times 10^3$  of HCT-116 cells per well of a 96-well plate or  $3 \times 10^5$  of HCT116 cells per well of a 6-well plate in antibiotic-free media was added. Cells were either processed for analysis or drug-treated 48 h after transfection.

**Quantification of siRNA Cytotoxicity and Acumen Explorer Analysis.** HCT-116 cells were plated at 6,000 cells/well in 96-well plates pretreated with poly-L-lysine, then subjected to reverse transfection with 25 nM siRNA–DharmaFect1 transfection reagent (Dharmacon) according to the manufacturer’s instructions. Scrambled nontargeting and RNA- induced silencing complex-free controls were used for each experiment. At 48 h posttransfection, cells were prepared for analysis in the Acumen Explorer laser cytometer. After medium was aspirated from the cells, 100  $\mu$ L of 80% ethanol in PBS at  $-20$  °C was added to each well, and the cells were incubated at  $-20$  °C for 30 min. Each well was then washed twice in PBS, after which 100  $\mu$ L of 0.2 mg/ml RNase in PBS was added to each well and incubated for 1 h at 37 °C. The RNase solution was then aspirated, and 100  $\mu$ L of 10  $\mu$ M

propidium iodide was added to each well. The plate was incubated in the dark for 15 min before being analyzed for quantification of cell number and cell cycle profile. The plates were scanned using a 488-nm laser at a sampling resolution of 1  $\mu\text{m}$  in the X direction and 8  $\mu\text{m}$  in the Y direction. The whole well was selected for scanning. Cells were identified on the basis of size measurements, to exclude debris and large clusters of cells from analysis. This cell population was then subdivided into subG1, G1, S, G2/M,  $>4n$ , and  $8n$  subpopulations based on the total intensity readout from each cell. The data were exported to give the percentage of cells in each phase of the cell cycle within a well.

**Determination of subG1 Cells and Polyploidy by Flow Cytometry.** Cells were fixed with 70% ethanol and incubated with 6  $\mu\text{g}/\text{mL}$  of anti-MPM-2 antibody (Upstate) diluted in PBS/0.2%BSA for 1 h. The cells were then washed and incubated with Alexa Fluor 488-conjugated antibody (Invitrogen) diluted in PBS containing 50  $\mu\text{g}/\text{mL}$  of RNaseA and 50  $\mu\text{g}/\text{mL}$  of propidium iodide, and then analyzed with a BD LSR II flow cytometer. Cell doublets and debris were excluded from analysis on the basis of their pulse height and area, and at least  $3 \times 10^4$  events were recorded.

**RNA Extraction and cDNA Synthesis.** Total RNA was extracted using the Qiagen RNeasy system following the manufacturer's instruc-

tions. An Applied Biosystems high-capacity cDNA RT kit was used to synthesize cDNA from 1  $\mu\text{g}$  of total RNA.

**Survival Analysis.** The mean of the logged expression levels of CIN-survival or MTS-repressed genes was taken as a single prognostic factor and tested as a predictor of long-term outcome in 8 previously published data sets (8–15). Similar to Carter et al. (5), patients were divided into 2 groups, those above and those below the median of the average CIN-survival or MTS expression signature gene expression. For each cohort, the prognostic effects of these MTS-repressed genes were examined using Kaplan-Meier survival analysis (16) and the Cox proportional hazard model (17). The Sweave analysis is enclosed within the file available at <http://www.dspace.cam.ac.uk/handle/1810/217842>.

**Classification of Genomic Instability Status by DNA Image Cytometry.** Each tumor was classified as belonging to 1 of 3 groups: (i) diploid, with a distinct peak in the normal  $2c$  region and no cells exceeding  $5c$ ; (ii) aneuploid, with a main peak different from  $2c$  and a stemline scatter index (SSI)  $\leq 8.8$ ; or (iii) aneuploid, with varying numbers of cells ( $>5\%$ ) exceeding  $5c$  (SSI  $> 8.8$ ). This novel classification system adheres to the parameters established by Kronenwett et al. (18), who defined the SSI as a measurement of clonal heterogeneity in a tumor cell population.

- Hernandez-Vargas H, Palacios J, Moreno-Bueno G (2007) Molecular profiling of docetaxel cytotoxicity in breast cancer cells: Uncoupling of aberrant mitosis and apoptosis. *Oncogene* 26:2902–2913.
- Bani MR, et al. (2004) Gene expression correlating with response to paclitaxel in ovarian carcinoma xenografts. *Mol Cancer Ther* 3:111–121.
- Chen JG, Yang CP, Cammer M, Horwitz SB (2003) Gene expression and mitotic exit induced by microtubule-stabilizing drugs. *Cancer Res* 63:7891–7899.
- Storey JD, Tibshirani R (2003) Statistical significance for genomewide studies. *Proc Natl Acad Sci USA* 100:9440–9445.
- Carter SL, Eklund AC, Kohane IS, Harris LN, Szallasi Z (2006) A signature of chromosomal instability inferred from gene expression profiles predicts clinical outcome in multiple human cancers. *Nat Genet* 38:1043–1048.
- Whitfield ML, et al. (2002) Identification of genes periodically expressed in the human cell cycle and their expression in tumors. *Mol Biol Cell* 13:1977–2000.
- Jallepalli PV, et al. (2001) Securin is required for chromosomal stability in human cells. *Cell* 105:445–457.
- Ivshina AV, et al. (2006) Genetic reclassification of histologic grade delineates new clinical subtypes of breast cancer. *Cancer Res* 66:10292–10301.
- van de Vijver MJ, et al. (2002) A gene-expression signature as a predictor of survival in breast cancer. *N Engl J Med* 347:1999–2009.
- Miller LD, et al. (2005) An expression signature for p53 status in human breast cancer predicts mutation status, transcriptional effects, and patient survival. *Proc Natl Acad Sci USA* 102:13550–13555.
- van't Veer LJ, et al. (2002) Gene expression profiling predicts clinical outcome of breast cancer. *Nature* 415:530–536.
- Naderi A, et al. (2007) A gene-expression signature to predict survival in breast cancer across independent data sets. *Oncogene* 26:1507–1516.
- Chin K, et al. (2006) Genomic and transcriptional aberrations linked to breast cancer pathophysiologies. *Cancer Cell* 10:529–541.
- Wang Y, et al. (2005) Gene-expression profiles to predict distant metastasis of lymph-node-negative primary breast cancer. *Lancet* 365:671–679.
- Bild AH, et al. (2006) Oncogenic pathway signatures in human cancers as a guide to targeted therapies. *Nature* 439:353–357.
- Kaplan EL, Meier P (1958) Nonparametric estimation from incomplete observations. *J Am Stat Assoc* 53:437–481.
- Cox DR, Oakes D (1984) *Analysis of Survival Data* (Chapman & Hall, New York).
- Kronenwett U, et al. (2004) Improved grading of breast adenocarcinomas based on genomic instability. *Cancer Res* 64:904–909.









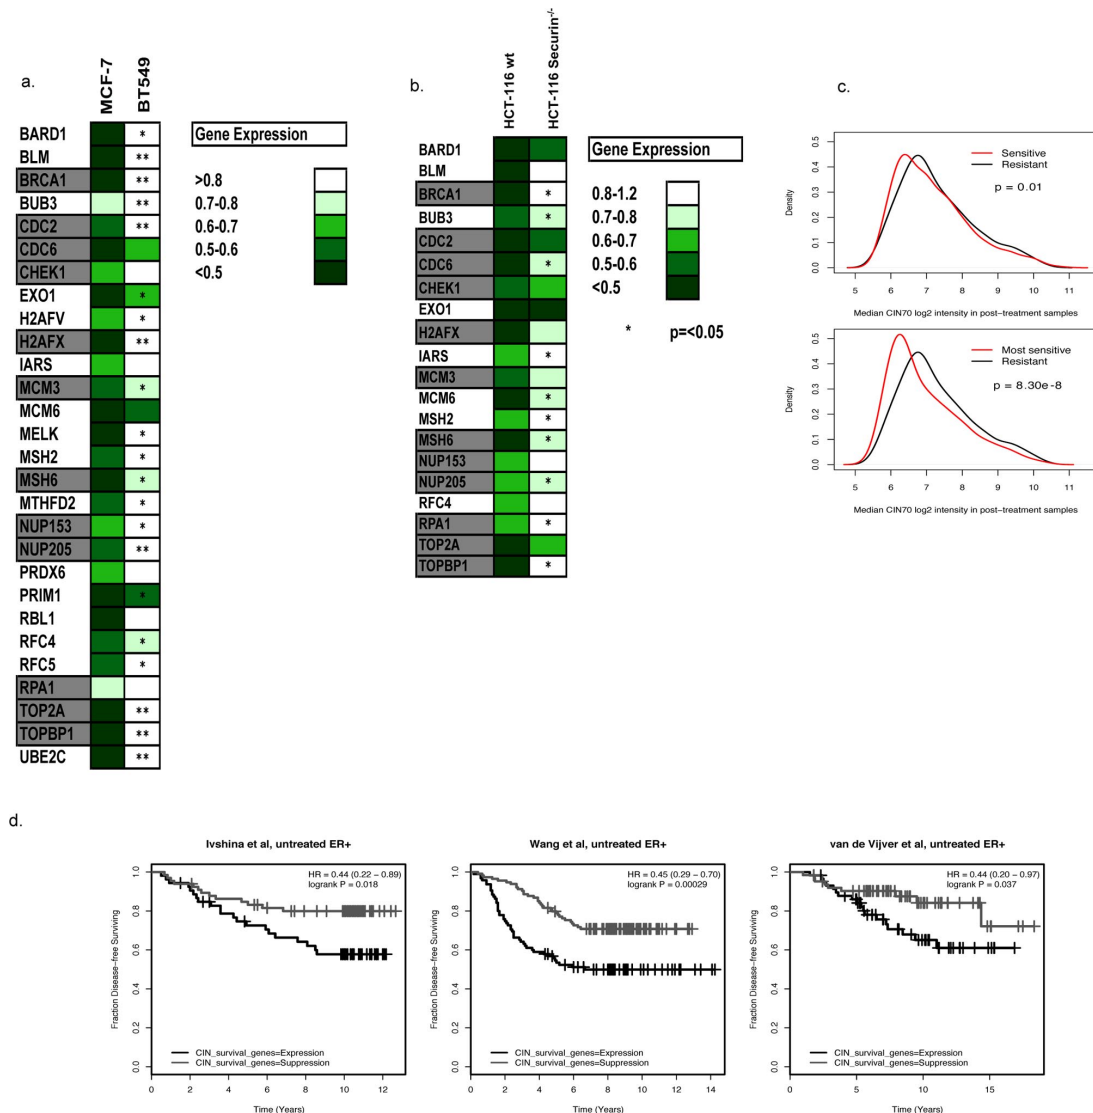

**Fig. S5.** (A) Quantification of gene repression following paclitaxel treatment of MCF-7 and BT549 cell lines. Fold change in gene expression post-paclitaxel treatment (24 h) relative to expression in vehicle control treated cells was determined by TaqMan qPCR analysis (normalization to GAPDH) following 24 h of paclitaxel treatment (concentration, 50% of the Gi50 dose) in 3 biological replicate experiments in the MCF-7 (CIN<sup>low</sup>) and BT549 (CIN<sup>high</sup>) breast cancer cell lines. Color-coding represents the mean fold change in gene expression of 3 biological replicates relative to cells treated with vehicle alone (+1 SD). CIN-survival genes are highlighted in gray. The significance of differential gene repression compared with the MCF-7 cell line after paclitaxel treatment is determined by the 2-tailed Student *t*-test: \* $P < 0.05$ ; \*\* $P < 0.005$ . (B) Impaired repression of MTS-cytotoxic CIN-survival genes after paclitaxel treatment in an isogenic model of CIN. Quantification of gene repression following treatment of HCT-116 wild-type parental cells compared with HCT-116 isogenic *hSecurin* ( $-/-$ ) after 24 h of paclitaxel treatment (50 nM) normalized to 18s. Color-coding represents the mean fold repression + 1 SD from 3 biological replicates. *P* values (\* $P < 0.05$ ) indicate significantly greater gene repression in the HCT-116 parental cell line (1-tailed Student *t*-test). (C) Residual CIN expression posttreatment is higher in paclitaxel-resistant compared to paclitaxel-sensitive tumors. (Upper) Sensitivity defined by the Rustin criteria: The distribution of log<sub>2</sub> intensities of CIN70 genes in residual tumors following paclitaxel across all Rustin-resistant (black line) and Rustin-sensitive (red line) patients. (Kolmogorov-Smirnov test,  $D = 0.11$ ,  $P = 0.01$ ). (Lower) Sensitivity defined by the CA125 coefficient: The same analysis was applied to taxane-resistant (black line: CA125 coefficient  $> -0.5$ ) and patients most sensitive to paclitaxel (red line: CA125 coefficient  $< -1$ , see Fig. S2B) (Kolmogorov-Smirnov test,  $D = 0.22$ ,  $P = 8.30e-8$ ). (D) Expression of CIN-survival genes correlates with poorer survival in breast cancer. The mean of the logged expression levels of CIN-survival genes was taken as a single prognostic factor and tested as a predictor of outcome in 4 untreated Estrogen receptor positive breast cancer cohorts. Similar to the study of Carter et al. (5), patients were divided into 2 groups with above- or below-median expression of the CIN-survival gene signature expression, and the prognostic effects were examined using Kaplan-Meier survival analysis and the Cox proportional hazard model (17). Shown are 3 significant Kaplan-Meier graphs from the 4 cohorts analyzed.

**Table S1a. Data sets used to derive the MTS response signature**

| Primary cancer | Cell line  | Author                      | Array type            | Number of genes on platform | Time points | Drug type  | Concentration | Sample number |
|----------------|------------|-----------------------------|-----------------------|-----------------------------|-------------|------------|---------------|---------------|
| Breast         | MCF7       | Hernández-Vargas et al. (1) | CDNA Oncochip         | 7463                        | 24 h, 48 h  | Docetaxel  | 4 nM          | 4             |
|                | MCF7       |                             |                       |                             | 24 h, 48 h  | Docetaxel  | 100 nM        | 4             |
|                | MDA-MB-231 |                             |                       |                             | 24 h, 48 h  | Docetaxel  | 100 nM        | 4             |
| Ovary          | 1A9        | Bani et al. (2)             | CDNA NCI              | 4535                        | 24 h        | Paclitaxel | 60 mg/kg      | 17            |
| NSCLC          | H460       | Kim et al.                  | CDNA Digital Genomics | 7008                        | 24 h        | Paclitaxel | 5 nM          | 2             |
| NSCLC          | A549       | Chen et al. (3)             | Affymetrix U95Av2     | 9089                        | 18 h        | Paclitaxel | 4 nM, 8 nM    | 3             |
|                | A549       |                             |                       |                             | 18 h        | Paclitaxel | 16 nM, 45 nM  | 2             |
|                | A549       |                             |                       |                             | 18 h        | Epothilone | 40 nM         | 2             |

Shown are the cell lines treated with the MTS (and study authors), the type of array used to derive each gene expression signature (cDNA or Affymetrix), the number of genes on the platform, the duration and concentration of drug exposure, and the number of biological replicates for each experiment.



**Table S1b. Genes overexpressed in CIN tumors are significantly repressed following MTS treatment across all data sets**

| CIN list  | Test statistic <i>D</i> /quantity of difference | <i>P</i> value |
|-----------|-------------------------------------------------|----------------|
| CIN27WP   | 0.2408                                          | 3.28e-07       |
| CIN382WP  | 0.1299                                          | < 2.2e-16      |
| CIN826WP  | 0.0942                                          | < 2.2e-16      |
| CIN1264WP | 0.0753                                          | < 2.2e-16      |

Cell cycle-regulated genes were removed from the CIN70 signature resulting in the signature of the top 5% (CIN382wp), 10% (CIN826wp), and 15% (CIN1264wp) of overexpressed genes in CIN tumors. The empirical frequency distribution of CIN27wp, CIN382WP, CIN826wp, and CIN1264wp signature genes was compared with the gene expression changes across all data sets following MTS exposure using the 1-sided bootstrap Kolmogorov-Smirnov test. The test statistics and *P* values for the Kolmogorov-Smirnov test reveal a significant left shift of the empirical frequency distribution of the CIN genes, indicating a greater likelihood of CIN-signature gene repression following MTS treatment.

**Table S1c. Genes overexpressed in CIN tumors are significantly repressed in MTS expression signatures but not in a 5-FU signature**

| Meta-analysis | Number of repressed genes after filtering | <i>P</i> value |              |
|---------------|-------------------------------------------|----------------|--------------|
|               |                                           | CIN27wp        | CIN382wp     |
| MTS rank 20   | 152                                       | .0027 (4)      | .0018 (18)   |
| MTS BTPC      | 72                                        | 9.2e-05 (4)    | 1.0e-08 (16) |
| 5-FU BTPC     | 64                                        | .18 (1)        | .06 (5)      |

Genes whose expression is influenced by cell cycle phase (6) were removed from the CIN70 signature and the signature of the top 5% (CIN382wp) of overexpressed genes in CIN tumors. Repression of genes in the CIN signature derived from 2 MTS meta-analysis signature methods (rank and BTPC), with the number of repressed genes after filtering demonstrated for each meta-analysis method shown. Three gene expression data sets were used to derive a 5-FU signature using the BTPC method. The table demonstrates the level of significance for the representation of MTS or 5-FU-repressed genes in the CIN signature. *P* values indicate the significance of the association of the CIN signature genes within the MTS or 5-FU expression signatures of repressed genes using the 1-sided Fisher's exact test, with the number of genes overlapping with each CIN data set given in parentheses.

**Table S1d. Repression of CIN genes occurs preferentially in taxane-sensitive xenografts.**

| CIN list  | Resistant xenograft |                | Sensitive xenograft |                |
|-----------|---------------------|----------------|---------------------|----------------|
|           | Test statistic      | <i>P</i> value | Test statistic      | <i>P</i> value |
| CIN27WP   | 0.31                | .26            | 0.20                | .56            |
| CIN382WP  | 0.08                | .32            | 0.16                | .01*           |
| CIN826WP  | 0.09                | .047*          | 0.14                | .001**         |
| CIN1264WP | 0.05                | .19            | 0.11                | .0006***       |

Publicly available expression data deriving from paclitaxel-treated human ovarian cancer xenografts in nude mice (2) were analyzed for repression of genes overexpressed in CIN tumors following paclitaxel treatment. The sensitive ovarian cancer cell line (1A9) and its paclitaxel-resistant derivative (1A9PTX22) were treated with 60 mg/kg of paclitaxel, which resulted in tumor responses in 1A9 tumors but not in 1A9PTX22 xenografts. *P* values are given for the Kolmogorov-Smirnov test comparing the distribution of genes overexpressed in the CIN signature (with proliferation genes excluded) with the distribution of genes having a negative fold change in ovarian cancer xenografts following paclitaxel treatment of nude mice. CIN genes are significantly repressed in taxane-sensitive ovarian cancer xenografts but less significantly in the paclitaxel-resistant xenograft model.

**Table S2. The Gi50 for each cell line and the concentrations of paclitaxel used in each cell line (nM) relative to the cell line Gi50**

| Cell line | 0.25× | 0.5× | Gi50 |
|-----------|-------|------|------|
| HCT116    | 12.5  | 25   | 50   |
| HCT15     | 50    | 100  | 200  |
| KM12      | 50    | 100  | 200  |
| HCC2998   | 50    | 100  | 200  |
| SW620     | 100   | 200  | 400  |
| COLO205   | 100   | 200  | 400  |

Table S3. Summary of clinical and experimental parameters in 14 dGS, 14 aGS, and 16 aGU breast carcinomas (see SWEAVE analysis)

| Ploidy | Age | Size, mm | Elston grade | Histology      | Side  | Lymph node metastasis | ER  | PR  | Centroid |
|--------|-----|----------|--------------|----------------|-------|-----------------------|-----|-----|----------|
| dGS    | 61  | ND       | II           | Ductal         | Left  | 0/0                   | Pos | Pos | Norm     |
| dGS    | 83  | 30       | II           | Ductal         | Right | 0/3                   | Pos | Pos | LumA     |
| dGS    | 41  | 18       | II           | Mucin          | Left  | 0/11                  | Pos | Pos | LumA     |
| dGS    | 51  | 12       | ND           | Lobular        | Right | 0/8                   | Neg | Neg | Norm     |
| dGS    | 48  | 25 x 20  | II           | Lobular        | Left  | 0/0                   | Pos | Pos | LumA     |
| dGS    | 75  | 12       | I            | Tubular        | Right | 0/0                   | Pos | Pos | LumA     |
| dGS    | 86  | 10       | ND           | Lobular        | Left  | 0/0                   | Pos | Neg | LumB     |
| dGS    | 86  | 26       | I            | Ductal         | Right | 4/6                   | Pos | Pos | LumA     |
| dGS    | 50  | ND       | II           | Lobular        | Right | 3/9                   | Pos | Pos | Norm     |
| dGS    | 54  | 70       | III          | Lobular        | Left  | 1/12                  | Pos | Pos | LumA     |
| dGS    | 62  | 20       | I            | Ductal         | Right | 0/3                   | ND  | ND  | LumA     |
| dGS    | 79  | 22       | II           | Ductal         | Left  | 4/16                  | Pos | ND  | LumA     |
| dGS    | 34  | 10       | II           | Ductal         | Left  | 0/0                   | Pos | Pos | LumA     |
| dGS    | 71  | 12       | I            | Lobular        | ND    | 0/0                   | Pos | Pos | ERBB2    |
| aGS    | 55  | 60       | III          | Ductal         | Right | 9/9                   | Pos | Neg | LumA     |
| aGS    | 62  | 11       | I            | Ductal         | Right | 0/23                  | Pos | Pos | LumA     |
| aGS    | 72  | 15       | II           | Ductal         | Left  | 0/5                   | Pos | Pos | LumA     |
| aGS    | 58  | 14       | I            | Ductal         | Left  | 0/0                   | Pos | Pos | LumA     |
| aGS    | 71  | ND       | II           | Paget's        | Right | 0/0                   | Pos | Pos | ERBB2    |
| aGS    | 81  | 26       | II           | Ductal         | Left  | 1/7                   | Pos | Pos | LumA     |
| aGS    | 62  | 60 + 15  | I            | Lobular        | Right | 2/7                   | Pos | Pos | LumA     |
| aGS    | 75  | 13       | I            | Ductal         | Left  | 0/0                   | Pos | Pos | LumA     |
| aGS    | 54  | 12 + 9   | II           | Ductal         | Right | 0/0                   | Pos | Neg | LumA     |
| aGS    | 49  | 54       | III          | Ductal/lobular | Right | 0/0                   | Neg | Pos | Norm     |
| aGS    | 52  | 14       | II           | Ductal         | Right | 0/6                   | Pos | Pos | LumA     |
| aGS    | 63  | 30       | II           | Ductal         | Left  | 0/0                   | ND  | ND  | Norm     |
| aGS    | 43  | 20       | III          | Ductal         | Left  | 0/6                   | Pos | Neg | LumA     |
| aGS    | 88  | 20       | III          | Ductal         | Left  | 0/0                   | Pos | Pos | LumA     |
| aGU    | 54  | 20       | III          | Ductal         | Right | 0/5                   | Neg | Neg | Basal    |
| aGU    | 62  | 35       | III          | Comedo         | Right | 0/35                  | Pos | Pos | ERBB2    |
| aGU    | 43  | 35       | III          | Ductal         | Left  | 0/0                   | Neg | Pos | Basal    |
| aGU    | 46  | 20       | III          | Ductal         | Left  | 0/0                   | Neg | Neg | Basal    |
| aGU    | 54  | 30       | III          | Medullary      | ND    | 14/15                 | Neg | Neg | Basal    |
| aGU    | 74  | 40       | III          | Ductal         | Left  | 0/17                  | Neg | Neg | Basal    |
| aGU    | 55  | 40       | III          | Ductal         | Right | 0/0                   | Pos | Pos | LumB     |
| aGU    | 71  | 30       | III          | Ductal         | Left  | 0/0                   | Pos | Pos | LumB     |
| aGU    | 79  | 16       | III          | Ductal         | Left  | 4/14                  | Pos | Pos | ERBB2    |
| aGU    | 57  | 25       | III          | Ductal         | Left  | 0/2                   | Neg | Neg | ERBB2    |
| aGU    | 59  | 20       | III          | Ductal         | Left  | 1/9                   | Neg | Neg | ERBB2    |
| aGU    | 85  | 45       | III          | Comedo         | Right | 0/3                   | Neg | Neg | Basal    |
| aGU    | 66  | 12       | III          | Lobular        | Left  | 0/0                   | Pos | Pos | Norm     |
| aGU    | 62  | 12       | II           | Ductal         | Right | 0/10                  | Neg | Neg | Basal    |
| aGU    | 60  | 18 + 9   | III          | Ductal         | ND    | 0/ND                  | Neg | Neg | Basal    |
| aGU    | 57  | 8        | III          | Metaplastic    | Right | 0/0                   | Neg | Neg | Basal    |

ER, estrogen receptor; PR, progesterone receptor; Pos, positive; Neg, negative; ND, not determined.
